# Supplementary material for: Body Mass Index and Association With Cardiovascular Outcomes in Patients With Stable Coronary Heart Disease – A STABILITY Substudy
Source: PubMed Central journal article supplement — J Am Heart Assoc. 2022 Jan 21;11(3):e023667. doi: 10.1161/JAHA.121.023667 (PMC9238503; doi:10.1161/jaha.121.023667), 2022-01-21
Supplement: JAH3-11-e023667-s001.pdf [file JAH3-11-e023667-s001.pdf]

# **SUPPLEMENTAL MATERIAL**

**Figure S1A.** The association of body mass index (BMI) with clinical outcomes (adjusted). Non-Asian population.

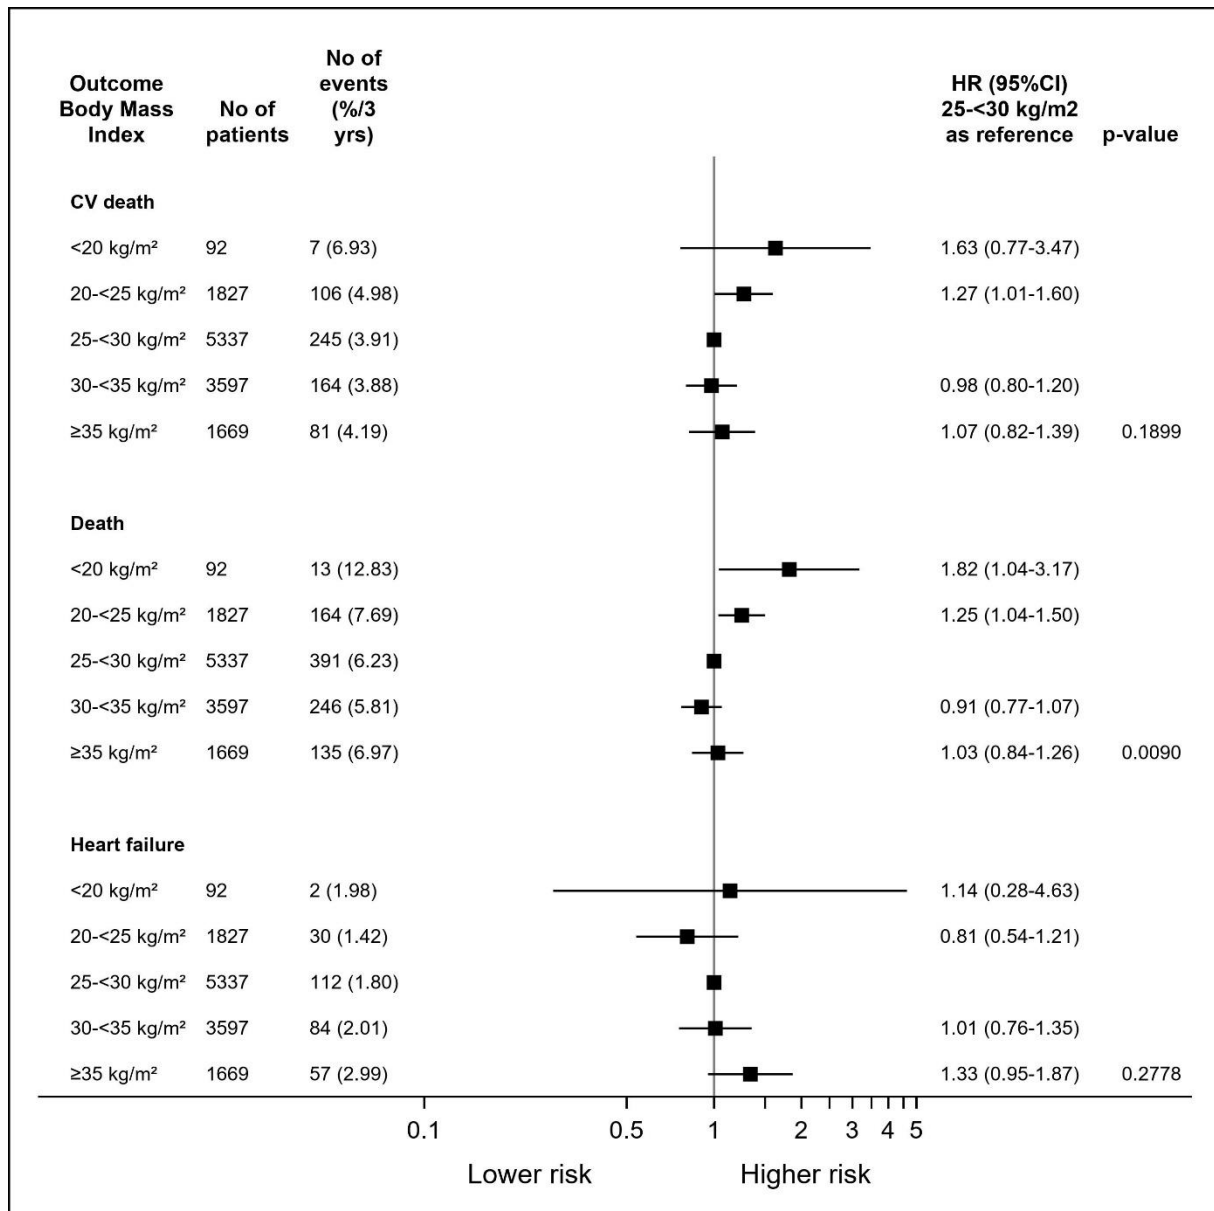

BMI 25<30 kg/m<sup>2</sup> as reference

Adjusted for age, sex, randomized treatment, prior percutaneous coronary intervention (PCI)/coronary artery bypass grafting (CABG), prior MI, renal dysfunction, polyvascular disease, diabetes, smoking, stroke/transient ischemic attack (TIA), congestive heart failure, systolic blood pressure, geographic region, chronic obstructive pulmonary disease (COPD), cancer diagnosis and Asian/Japanese origin.

P-value denotes difference between groups.

CV, cardiovascular; MACE, major adverse cardiovascular event; MI, myocardial infarction.

**Figure S1B.** The association of body mass index (BMI) with clinical outcomes (adjusted).  
Asian population.

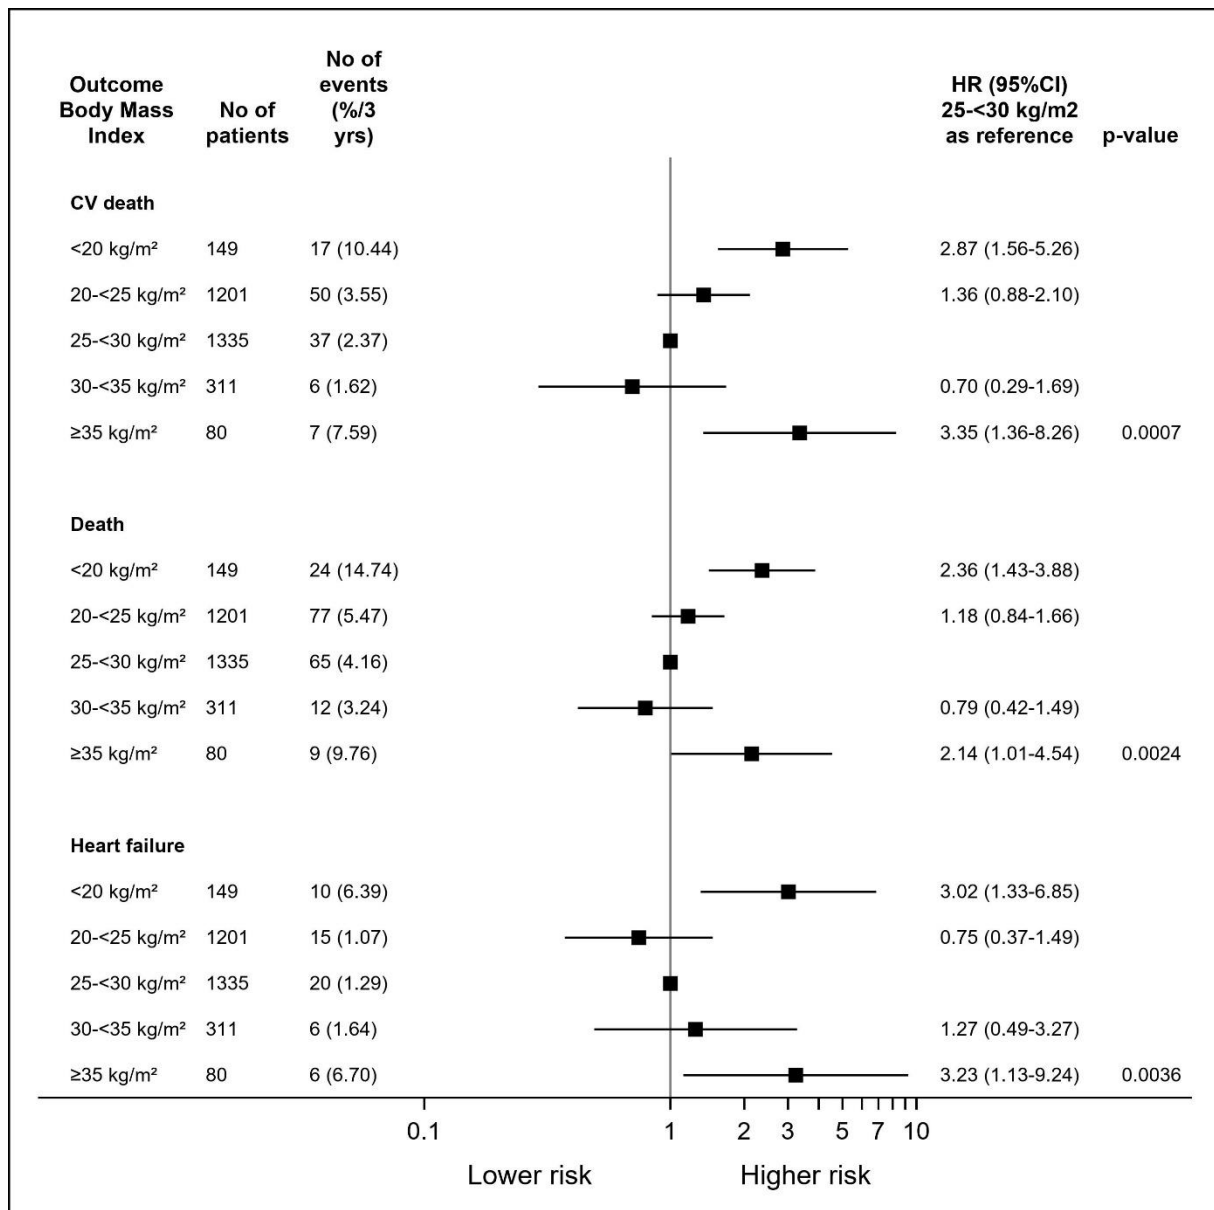

BMI 25<30 kg/m<sup>2</sup> as reference

Adjusted for age, sex, randomized treatment, prior percutaneous coronary intervention (PCI)/coronary artery bypass grafting (CABG), prior MI, renal dysfunction, polyvascular disease, diabetes, smoking, stroke/transient ischemic attack (TIA), congestive heart failure, systolic blood pressure, geographic region, chronic obstructive pulmonary disease (COPD), cancer diagnosis and Asian/Japanese origin.

P-value denotes difference between groups.

CV, cardiovascular; MACE, major adverse cardiovascular event; MI, myocardial infarction.
